# Supplementary material
Source: Research Square preprint supplement (doi:10.21203/rs.3.rs-9402809/v1)

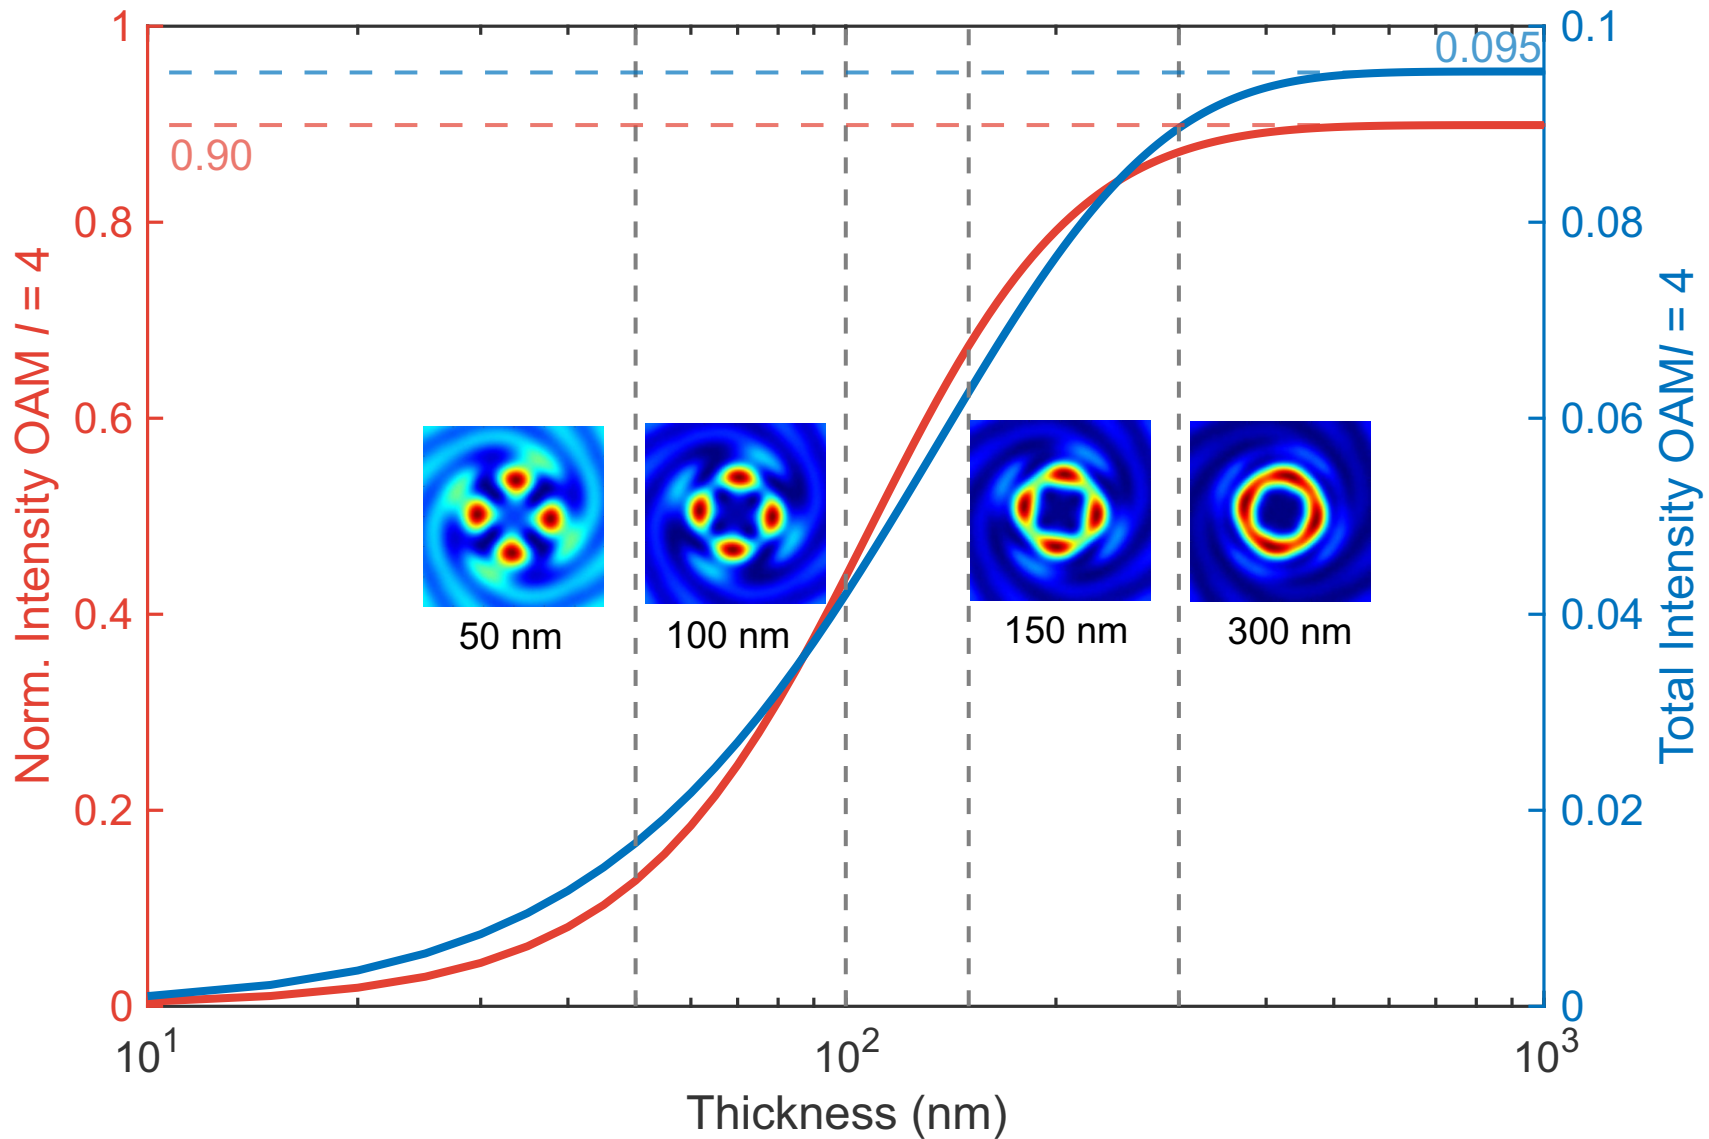

Supplement: Supplementary file 1 [file 71938a3ea25b8fab81c7d99d.pdf]

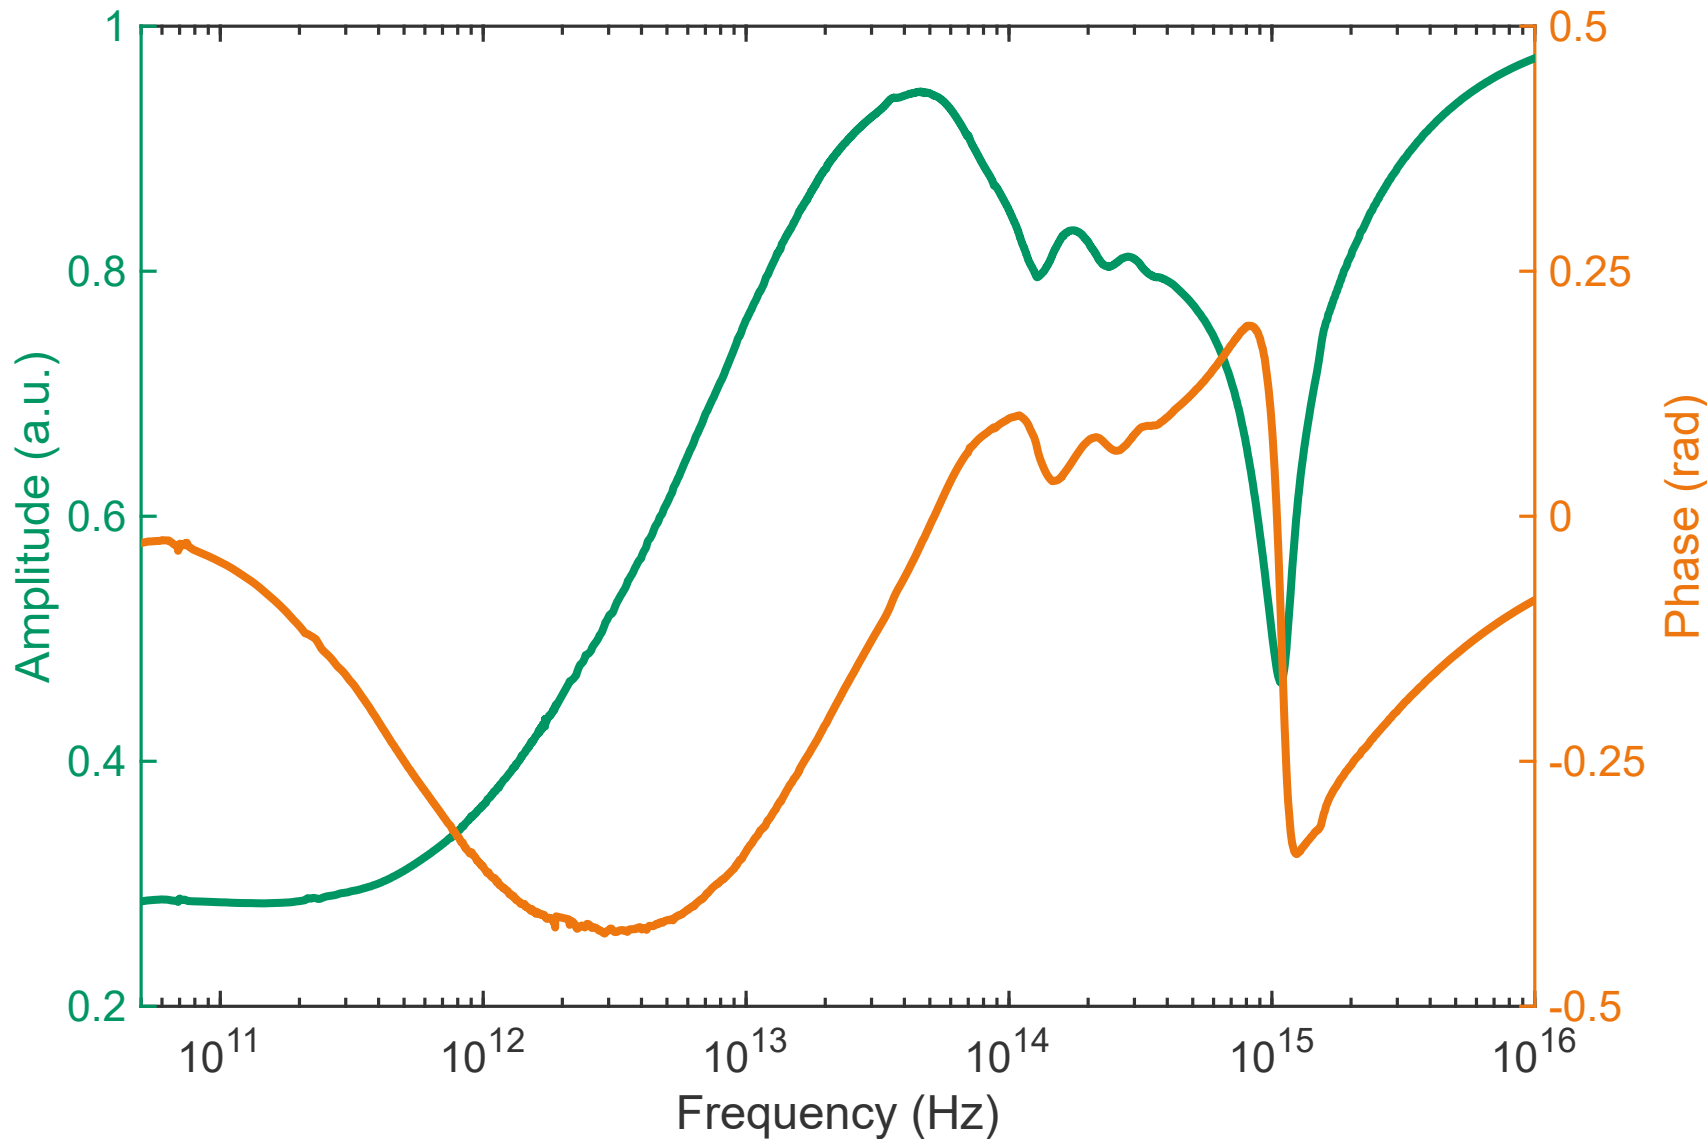

Supplement: Supplementary file 2 [file e59e625fd1701f87c1aee561.pdf]

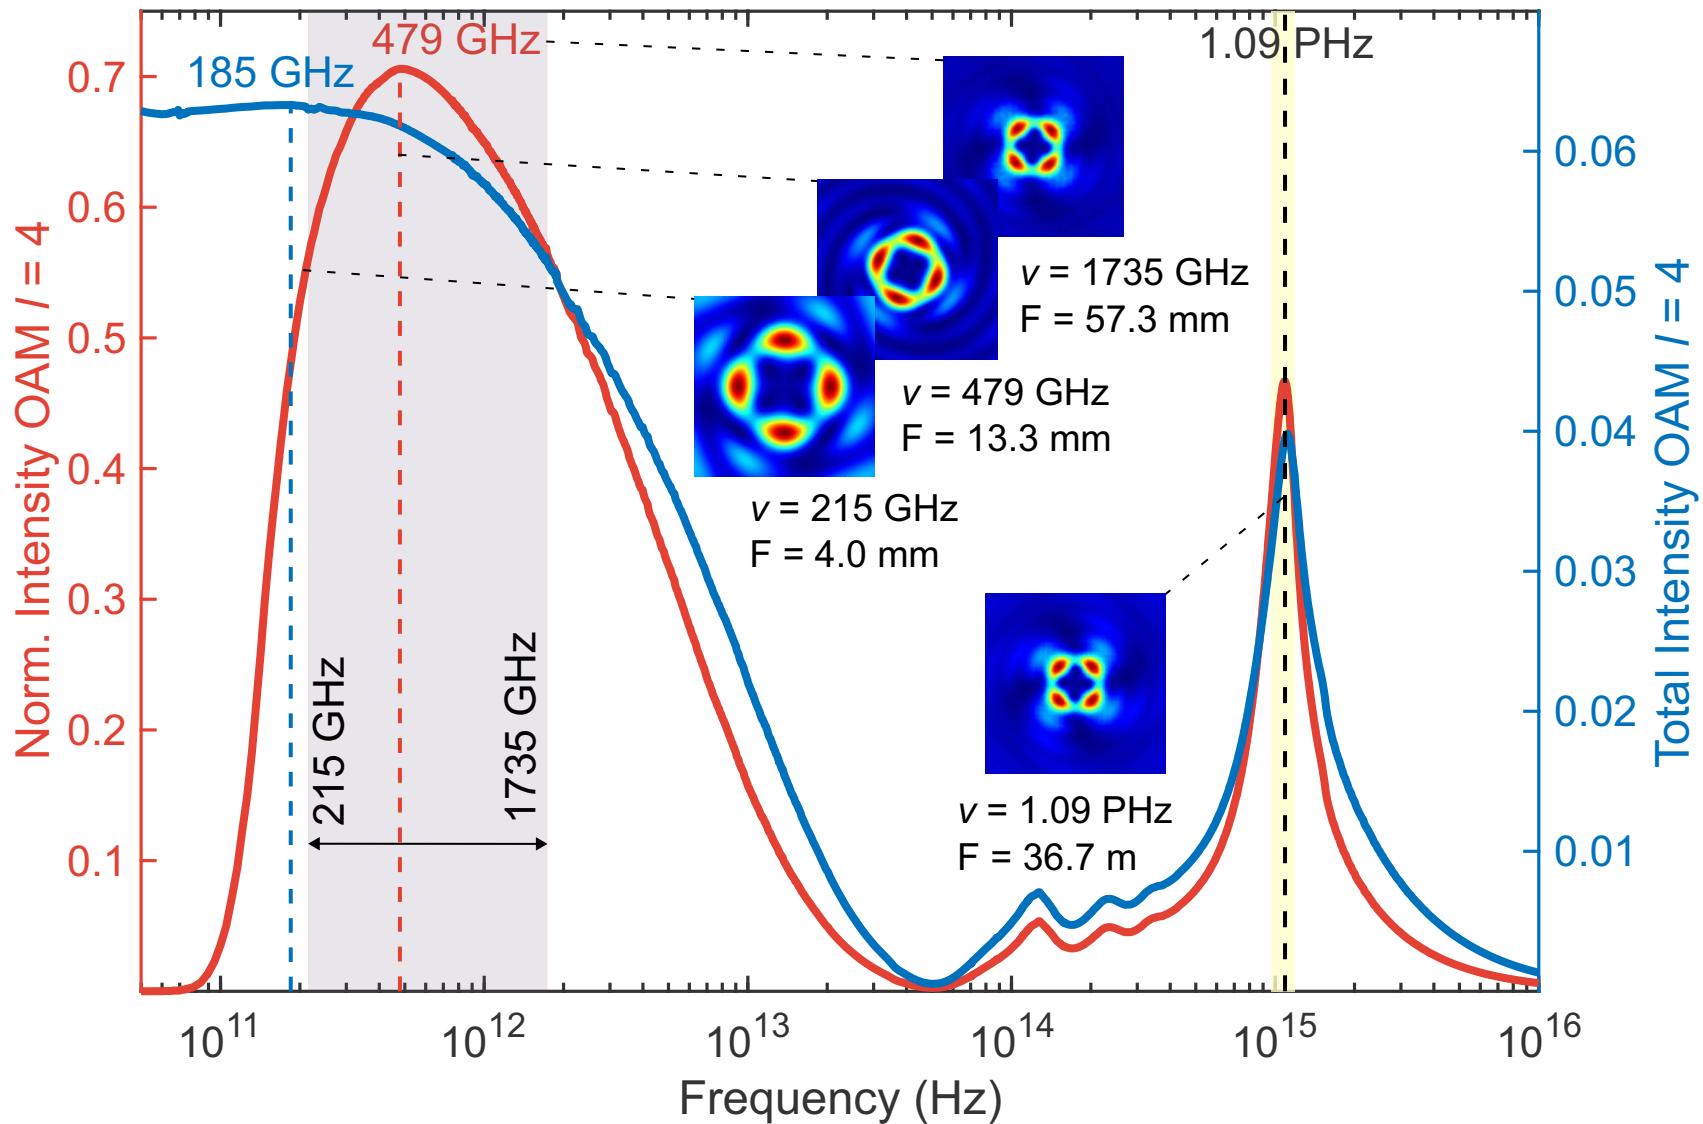

Supplement: Supplementary file 3 [file f5dd4f3ab9688d2ab9f9c8b8.pdf]
